# Supplementary material
Source: publisher figshare collection journal article supplement (https://geolsoc.figshare.com/ndownloader/files/22448489)
Supplement: Supplementary file 1 [file 22448489]

## Sheet: Sheet1
Supplementary Table 2
U-Pb-Th isotope analyses and ages of zircon grains from granitoids of Saraikela-Hata area, Singhbhum Craton and zircon standard GJ-1
Spot No.	Pb	Th	U	Th/U		207Pb/206Pb		207Pb/235U		206Pb/238U		208Pb/232Th		238U/232Th		207Pb/206Pb		207Pb/235U		206Pb/238U		208Pb/232Th		Concordance (%)
	ppm	ppm	ppm			Ratio	1 σ	Ratio	1 σ	Ratio	1 σ	Ratio	1 σ	Ratio		Age	1 σ	Age	1 σ	Age	1 σ	Age	1 σ
																(Ma)		(Ma)		(Ma)		(Ma)
SBG28, Saraikela gneiss
SBG28-02	194.422	199.906	205.428	0.97312		0.267089	0.00395639	24.4951	0.499526	0.656926	0.0106755	0.193544	0.00421462	1.04178		3300	23.15	3288.31	20.0197	3255.21	41.5713	3576.1	71.3731	98.9935
SBG28-04	145.771	67.7837	231.862	0.292346		0.25057	0.00386691	17.0955	0.282838	0.489954	0.00526901	0.168933	0.00385613	3.48811		3188.58	24.3775	2940.21	15.9962	2570.48	22.839	3154.95	66.677	87.425
SBG28-05	209.286	292.494	283.027	1.03345		0.280698	0.00420973	17.7092	0.293971	0.452453	0.00425427	0.179171	0.00475957	1.01976		3368.51	23.15	2974.08	16.082	2406.15	18.9264	3331.21	81.5841	80.9041
SBG28-08	267.399	443.761	668.193	0.664121		0.206143	0.00326698	8.31725	0.174175	0.289148	0.003393	0.105464	0.0028203	1.55488		2875.61	25.6175	2266.2	19.0438	1637.27	16.9898	2026.58	51.5662	72.2474
SBG28-09	145.703	111.202	244.96	0.45396		0.228728	0.0034982	14.3575	0.340991	0.44995	0.00762894	0.163988	0.00432088	2.22548		3042.9	24.6925	2773.62	22.6239	2395.03	33.9426	3069.26	75.0305	86.3501
SBG28-10	220.706	451.401	441.129	1.02329		0.236228	0.00340741	10.787	0.182176	0.329454	0.00373475	0.101666	0.00184493	1.01699		3094.75	23.1475	2504.94	15.7857	1835.74	18.1366	1957.03	33.8489	73.2845
SBG28-11	108.344	103.949	131.567	0.790083		0.264785	0.00418728	20.3653	0.376752	0.554535	0.00625355	0.181987	0.00385341	1.36637		3275.61	25.7725	3108.87	18.0295	2844.01	25.9779	3379.43	65.8942	91.4805
SBG28-12	204.301	67.5686	279.516	0.241734		0.253935	0.0043862	19.7987	0.348711	0.56349	0.00503284	0.164358	0.00376444	4.22356		3209.57	26.6925	3081.57	17.1524	2881.04	20.8091	3075.69	65.3473	93.4923
SBG28-14	197.738	127.538	317.363	0.401868		0.24444	0.00374178	15.8565	0.284229	0.468431	0.00518032	0.150433	0.00300438	2.5457		3149.08	24.38	2868.19	17.2318	2476.68	22.7809	2832.5	52.7847	86.3498
SBG28-15	185.917	51.2557	368.684	0.139023		0.242061	0.00426281	15.0271	0.539032	0.43806	0.0110111	0.226309	0.00704436	8.29194		3144.45	28.0875	2816.96	34.2036	2341.95	49.3756	4123.47	116.106	83.1376
SBG74, Rajnagar leucogranite
SBG74-02	123.754	86.0429	127.31	0.675854		0.270118	0.00487026	25.6429	0.468036	0.683604	0.00558259	0.176844	0.00352115	1.54805		3306.48	27.6225	3333.02	17.9806	3358.18	21.4522	3291.28	60.4755	100.755
SBG74-03	100.537	58.1712	100.884	0.576615		0.26457	0.00451652	26.6139	0.50451	0.724872	0.00817363	0.187241	0.00429607	1.75529		3275.92	26.855	3369.36	18.6922	3514.28	30.6064	3469.07	73.1385	104.301
SBG74-04	126.359	109.58	154.75	0.708113		0.264883	0.00425952	21.4734	0.353181	0.584248	0.00499129	0.12551	0.00234768	1.38788		3276.23	25.31	3160.21	16.1014	2966.06	20.373	2389.82	42.1603	93.8564
SBG74-05	205.667	218.067	333.343	0.654182		0.238932	0.00466959	16.8207	0.596373	0.494649	0.0117024	0.133773	0.00243981	1.39344		3112.65	31.1775	2924.67	34.0381	2590.76	50.492	2537.66	43.4955	88.5829
SBG74-06	129.545	108.218	143.656	0.753317		0.272111	0.00493863	23.3023	0.431059	0.616927	0.00541519	0.147028	0.00302691	1.34827		3318.21	28.57	3239.65	18.1444	3097.68	21.6542	2772.59	53.3384	95.6176
SBG74-07	176.709	134.38	248.641	0.540457		0.254602	0.00488232	19.1969	0.582076	0.536118	0.0113414	0.158326	0.00351767	1.81909		3213.89	30.2425	3051.76	29.3369	2767.18	47.6185	2970.71	61.3817	90.6748
SBG74-08	85.2188	50.8289	91.3037	0.556701		0.266621	0.00464993	24.8041	0.441697	0.671096	0.0066817	0.173899	0.00382673	1.74846		3286.11	27.4725	3300.53	17.525	3310.1	25.8372	3240.65	65.8888	100.29
SBG74-10	182.356	181.928	269.745	0.674444		0.245647	0.00447014	16.1605	0.448423	0.466986	0.00822624	0.14531	0.00450368	1.71633		3157.1	29.7825	2886.34	26.6056	2470.33	36.1734	2742.3	79.4801	85.587
SBG74-11	212.886	286.895	319.336	0.89841		0.249053	0.00476858	16.869	0.536935	0.478852	0.0110025	0.110083	0.00211029	1.13323		3178.7	30.555	2927.42	30.5754	2522.26	47.9798	2110.86	38.4238	86.16
SBG74-12	129.984	122.965	157.803	0.77923		0.268922	0.00546248	21.3525	0.45966	0.570482	0.00617157	0.146886	0.00334555	1.22983		3299.69	31.7925	3154.73	20.9904	2909.8	25.3814	2770.1	58.9605	92.236
SBG74-13	255.567	310.571	735.228	0.422414		0.177195	0.0039981	6.46715	0.172755	0.260274	0.00309168	0.121769	0.00272314	2.61968		2627.78	38.12	2041.44	23.5322	1491.24	15.8347	2322.52	49.066	73.0485
SBG74-14	225.007	155.587	454.696	0.342179		0.215867	0.00391435	11.4649	0.205797	0.381925	0.00277826	0.124828	0.00239551	3.09577		2950.31	29.32	2561.73	16.8543	2085.27	13.0089	2377.57	43.0452	81.4009
SBG74-15	430.404	604.089	729.741	0.827813		0.229022	0.00383633	13.8345	0.362102	0.431319	0.00740342	0.115213	0.0028409	1.17082		3045.38	26.8525	2738.44	24.8548	2311.66	33.3671	2204.05	51.4887	84.4152
SBG74-16	179.974	313.628	298.435	1.05091		0.242214	0.00390445	15.0099	0.255043	0.446116	0.00393696	0.0647357	0.00118014	0.902866		3134.88	25.62	2815.87	16.2883	2377.96	17.5969	1267.84	22.403	84.4486
Supplementary Table 2 contd.
Spot No.	Pb	Th	U	Th/U		207Pb/206Pb		207Pb/235U		206Pb/238U		208Pb/232Th		238U/232Th		207Pb/206Pb		207Pb/235U		206Pb/238U		208Pb/232Th		Concordance (%)
	ppm	ppm	ppm			Ratio	1 σ	Ratio	1 σ	Ratio	1 σ	Ratio	1 σ	Ratio		Age	1 σ	Age	1 σ	Age	1 σ	Age	1 σ
SBG55, Hata leucogranite
SBG55-01	249.76	306.205	342.936	0.892892		0.247569	0.00546678	17.8084	0.41719	0.517045	0.0080361	0.140717	0.00459435	1.22295		3169.44	30.5525	2979.44	22.6131	2686.64	34.1788	2661.09	81.4068	90.1724
SBG55-02	97.547	60.3706	101.347	0.595685		0.265617	0.0048079	25.9833	0.525811	0.701842	0.00895335	0.188955	0.00527768	1.69835		3280.55	28.3975	3345.91	19.9167	3427.63	33.9649	3498.22	89.7205	102.442
SBG55-04	201.279	196.456	289.338	0.678985		0.246711	0.00388701	17.8316	0.330734	0.519035	0.00613767	0.118841	0.00323076	1.77632		3163.89	24.995	2980.69	17.9477	2695.09	26.0874	2269.7	58.3647	90.4182
SBG55-05	210.743	219.806	548.908	0.400443		0.210326	0.0047991	11.6613	0.76895	0.38195	0.0181738	0.26758	0.0382684	3.41503		2909.26	37.0375	2577.6	61.6916	2085.39	84.7833	4792.51	610.209	80.9042
SBG55-06	241.888	405.69	446.906	0.907775		0.215417	0.00395447	11.7002	0.287181	0.389718	0.00624528	0.111724	0.00337951	1.1043		2946.6	29.635	2580.72	23.0272	2121.52	28.9923	2140.72	61.4428	82.2068
SBG55-07	298.671	281.739	826.118	0.34104		0.195313	0.00358471	7.94751	0.189751	0.291819	0.00415755	0.0989742	0.00245035	3.04287		2787.35	29.935	2225.09	21.5864	1650.61	20.7661	1907.57	45.0665	74.1821
SBG55-08	212.575	163.921	563.647	0.290821		0.19523	0.00319593	8.35419	0.172449	0.307153	0.00382437	0.106619	0.00257987	3.38152		2786.73	26.0775	2270.22	18.7826	1726.68	18.8835	2047.69	47.121	76.0579
SBG55-09	303.655	337.413	896.401	0.376409		0.186706	0.0028631	7.15406	0.144281	0.275087	0.00365706	0.0891305	0.00240511	2.5808		2713.27	25.3125	2130.8	18.0249	1566.57	18.5082	1725.71	44.6344	73.5204
SBG55-10	193.068	129.435	236.701	0.546828		0.254485	0.00399297	21.4638	0.399354	0.607039	0.0078752	0.15445	0.00354322	1.86263		3212.65	25.46	3159.77	18.1786	3058.14	31.6334	2902.97	62.0351	96.7834
SBG55-12	234.478	262.564	601.641	0.436413		0.192721	0.00367952	8.23347	0.160727	0.30722	0.00335311	0.0833666	0.00223755	2.40879		2765.74	26.85	2257.03	17.7413	1727.01	16.5618	1618.46	41.7457	76.5171
SBG55-13	227.175	125.366	452.697	0.276931		0.226771	0.00455693	12.3084	0.249487	0.389848	0.00339412	0.122728	0.00611096	3.59407		3029.32	31.6375	2628.21	19.1188	2122.12	15.7843	2339.79	110.014	80.744
SBG55-15	346.24	506.095	982.496	0.515111		0.195805	0.00334129	7.53703	0.216524	0.273528	0.00516182	0.0889926	0.00236093	2.00644		2791.66	27.775	2177.4	25.7956	1558.68	26.1419	1723.16	43.82	71.5847
SG530, Hat Gamharia granite
SG77-02	226.139	151.275	328.174	0.460959		0.243708	0.00385038	17.1424	0.257197	0.505136	0.00414247	0.122835	0.00324664	2.06988		3144.14	24.535	2942.83	14.5331	2635.83	17.799	2443.01	47.8645	89.5678
SG77-03	284.579	222.393	390.416	0.569631		0.243419	0.0035343	17.7895	0.251015	0.52493	0.00390078	0.193999	0.00637382	1.67793		3142.29	22.84	2978.42	13.7152	2720.05	16.5552	2526.02	46.0704	91.3253
SG77-04	261.103	258.627	487.858	0.530127		0.225313	0.00320342	12.2742	0.188312	0.391194	0.00344138	0.104704	0.00215002	1.80586		3020.37	22.84	2625.6	14.5148	2128.36	15.9878	2198.26	43.0882	81.0621
SG77-05	195.093	193.595	345.292	0.56067		0.222964	0.00347807	12.8809	0.205324	0.415257	0.00320681	0.131338	0.0031978	1.72067		3002.16	24.9975	2670.98	15.1287	2238.91	14.6568	2103.47	44.4566	83.8236
SG77-06	187.37	84.9357	251.755	0.337374		0.249316	0.00435658	19.3307	0.36807	0.557983	0.0061978	0.112663	0.00264718	2.83363		3180.56	27.775	3058.47	18.4999	2858.29	25.6908	3195.35	77.1183	93.4548
SG77-07	203.565	186.005	436.86	0.425778		0.2268	0.00587212	10.7274	0.436424	0.331767	0.0060801	0.134858	0.00354537	2.30093		3029.32	42.4375	2499.8	37.8247	1846.94	29.4476	3522.44	265.719	73.8834
SG77-08	195.397	180.034	368.166	0.489002		0.224575	0.00355151	12.5944	0.242687	0.402356	0.00429673	0.0774083	0.00179716	2.03732		3013.89	25.6175	2649.8	18.2159	2179.88	19.7865	2234.36	52.1111	82.2657
SG77-09	191.2	157.364	342.228	0.459823		0.237633	0.00360742	14.2572	0.320058	0.429404	0.00651037	0.118526	0.00289281	2.19355		3105.55	24.075	2766.97	21.3832	2303.03	29.3872	2553.27	63.9532	83.2328
SG77-10	235.82	119.34	293.32	0.40686		0.258247	0.00376562	21.8517	0.32483	0.608778	0.00436323	0.173597	0.00329063	2.41529		3236.11	23.145	3177.16	14.5941	3065.11	17.5617	2972.78	57.9578	96.4732
SG77-11	200.098	190.204	390.115	0.487559		0.229174	0.00382475	12.6645	0.286679	0.395945	0.00555772	0.191042	0.00334779	2.02814		3045.99	26.5425	2655.02	21.379	2150.34	25.6916	2166.73	47.8344	80.9915
SG77-11	200.098	190.204	390.115	0.487559		0.242075	0.00437694	16.5819	0.330408	0.493253	0.00576106	0.115352	0.00190594	2.22825		3144.45	28.705	2910.97	19.184	2584.73	24.9098	2464.35	60.714	88.7928
GJ-1, standard
GJ-1	31.2166	8.73706	300.417	0.0290831		0.0599042	0.00168837	0.811632	0.0230082	0.0976849	0.00118855	0.0387883	0.00281708	34.3087		611.13	61.1	603.369	12.9021	600.827	6.98755	769.176	54.8133	99.5787
GJ-1	30.5476	8.94815	297.246	0.0301035		0.0598974	0.00165122	0.810192	0.0214207	0.0975334	0.00112664	0.0370694	0.00259323	32.9452		598.17	59.2475	602.562	12.0224	599.938	6.62528	735.702	50.5414	99.5645
GJ-1	31.0129	8.87285	305.139	0.0290781		0.0580881	0.00154376	0.785204	0.0201132	0.0973289	0.00101004	0.0354181	0.00262417	34.0673		531.52	59.2525	588.448	11.4469	598.736	5.94242	703.493	51.226	101.748
GJ-1	31.0395	8.86625	309.909	0.0286092		0.0623644	0.00160398	0.831465	0.0214363	0.0963026	0.00092045	0.0327916	0.00235551	33.4929		687.05	54.47	614.425	11.8918	592.704	5.42183	652.156	46.0985	96.4649
GJ-1	30.8744	8.80506	303.618	0.0290004		0.0620856	0.00150732	0.828691	0.020019	0.0965019	0.000978043	0.0343483	0.00225366	33.3845		675.94	47.2175	612.886	11.1234	593.876	5.75892	682.598	44.0387	96.8983
GJ-1	31.0197	8.78836	302.878	0.0290162		0.0603898	0.00156277	0.805491	0.020639	0.0966162	0.00100597	0.0308108	0.00208374	33.2546		616.685	55.545	599.921	11.6142	594.548	5.92225	613.353	40.8582	99.1044
GJ-1	32.619	9.58379	320.03	0.0299465		0.0588614	0.00142817	0.803952	0.0195918	0.0983515	0.000972504	0.0360584	0.00208309	34.1125		561.145	51.84	599.055	11.0351	604.741	5.71713	715.989	40.6386	100.949
GJ-1	32.4567	9.44717	316.206	0.0298766		0.0605015	0.00128023	0.83104	0.017299	0.0988325	0.000855685	0.0321727	0.00219135	34.1083		620.39	45.205	614.189	9.60203	607.563	5.03067	640.041	42.9115	98.9212
GJ-1	32.2789	9.20877	313.634	0.0293616		0.0604009	0.00135853	0.832684	0.0186175	0.0989968	0.000964769	0.0373518	0.00219343	34.5566		616.685	48.14	615.1	10.3234	608.527	5.6686	741.205	42.7378	98.9314
GJ-1	31.9566	9.00728	320.777	0.0280796		0.0621765	0.00263979	0.831358	0.0369	0.0965723	0.00101386	0.0328985	0.00213651	36.4885		679.64	90.7275	614.365	20.4632	594.29	5.9688	654.248	41.8082	96.7323
GJ-1	31.7512	8.98787	307.35	0.0292431		0.0603539	0.00147543	0.825318	0.020437	0.0991005	0.000931094	0.03959	0.00258458	35.19		616.685	86.0975	611.011	11.3762	609.135	5.47092	784.769	50.2506	99.693
GJ-1	31.3704	8.85675	305.381	0.0290023		0.0597093	0.00146042	0.796187	0.0189479	0.0963335	0.00114016	0.0345284	0.00217771	33.4442		594.47	58.3225	594.676	10.7189	592.886	6.71174	686.118	42.5472	99.699
GJ-1	31.4953	8.85939	305.662	0.0289843		0.0567621	0.00134093	0.767038	0.0176592	0.0976344	0.00111748	0.0327616	0.00215533	33.2939		483.375	86.1	578.063	10.155	600.531	6.57096	651.569	42.182	103.887
GJ-1	31.4374	8.81257	302.799	0.0291037		0.0577867	0.0016063	0.786072	0.0210193	0.0982126	0.00116223	0.0367253	0.00246407	33.1901		520.41	61.1025	588.941	11.9562	603.926	6.82996	728.995	48.0401	102.544
GJ-1	30.9759	8.8165	309.109	0.0285223		0.058616	0.00150963	0.790674	0.0205957	0.0975586	0.000927928	0.0426286	0.00262351	34.4828		553.74	57.3975	591.554	11.6855	600.085	5.45973	843.76	50.8589	101.442
GJ-1	31.236	8.81664	308.845	0.0285472		0.0599015	0.00147721	0.810946	0.0207734	0.0982232	0.00114119	0.0385519	0.00316347	34.009		599.71	53.695	602.985	11.6547	603.988	6.70657	764.574	61.5672	100.166
